# Supplementary material for: The Nature of the (Oligo/Hetero)Arene Linker Connecting Two Triarylborane Cations Controls Fluorimetric and Circular Dichroism Sensing of Various ds-DNAs and ds-RNAs
Source: MDPI journal article supplement (doi:10.3390/molecules28114348), 2023-05-25
Supplement: s1 [file s1]

## Supporting Information

### The nature of the (oligo/hetero)arene linker connecting two triarylborane cations controls fluorimetric and circular dichroism sensing of various ds-DNAs and ds-RNAs

Lidija-Marija Tumor <sup>1</sup>, Dijana Saftić Pavlović <sup>1</sup>, Ivo Crnolatac <sup>1</sup>, Željka Ban <sup>1</sup>, Matea Maslač <sup>1</sup>, Stefanie Griesbeck <sup>2</sup>, Todd B. Marder <sup>2,\*</sup> and Ivo Piantanida <sup>1,\*</sup>

<sup>1</sup>Division of Organic Chemistry & Biochemistry, Ruđer Bošković Institute, Zagreb, Croatia.

<sup>2</sup>Institut für Anorganische Chemie, and Institute for Sustainable Chemistry & Catalysis with Boron, Julius-Maximilians-Universität Würzburg, Würzburg, Germany.

#### Table of Contents

General information

Spectrophotometric titrations

Thermal melting experiments

CD experiments

References

**Table S1.** Groove widths and depths for selected nucleic acid conformations[1,2].

| Structure type            | Groove width [Å] |       | Groove depth [Å] |       |
|---------------------------|------------------|-------|------------------|-------|
|                           | major            | minor | major            | minor |
| [a] poly rA – poly rU     | 3.8              | 10.9  | 13.5             | 2.8   |
| [b] B-DNA (e.g. ct-DNA)   | 11.7             | 5.7   | 8.5              | 7.5   |
| [b] poly dGdC – poly dGdC | 13.5             | 9.5   | 10.0             | 7.2   |
| [b] poly dAdT – poly dAdT | 11.2             | 6.3   | 8.5              | 7.5   |

[a] A-helical structure (e.g., A-DNA or RNA)

[b] B- helical structure (e.g., B-DNA)

**Spectrophotometric data collected in buffer system:**

**Table S2.** The photophysical data of compounds **2-5** in water [3]

|          | $\lambda_{\text{abs}}/\text{nm}$ | $\varepsilon / \text{M}^{-1} \text{cm}^2$ | $\lambda_{\text{em}}/\text{nm}$ | Stokes shift/<br>$\text{cm}^{-1}$ | $\Phi_f$ |
|----------|----------------------------------|-------------------------------------------|---------------------------------|-----------------------------------|----------|
| <b>2</b> | 364                              | 57000                                     | 486                             | 6900                              | 0.58     |
| <b>3</b> | 375                              | 62000                                     | 513                             | 7200                              | 0.33     |
| <b>4</b> | 365                              | 61000                                     | 467                             | 6000                              | 0.12     |
| <b>5</b> | 594                              | 50000                                     | 620                             | 7100                              | 0.13     |

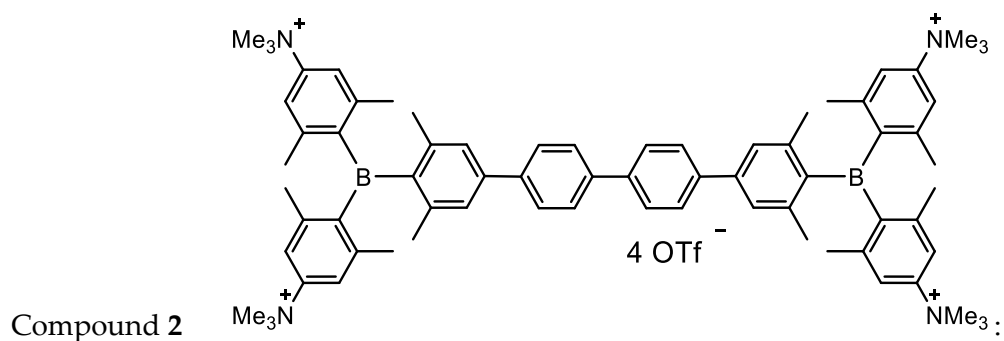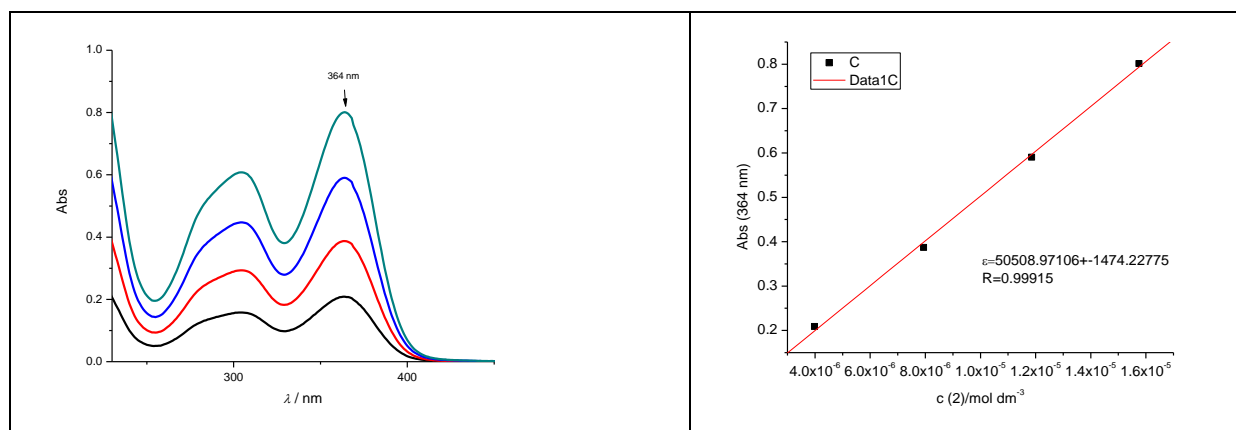

Figure S1. Left: UV/Vis spectra of **2** (concentration range from  $4 \times 10^{-6}$  –  $1.6 \times 10^{-5}$  M); Right: linear dependence of the absorbance at 364 nm on the **2** concentration (Na-cacodylate buffer,  $I = 0.05$  M, pH = 7.0).

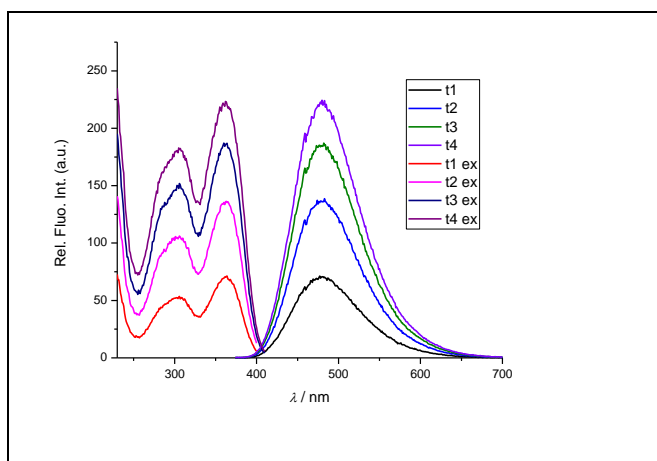

Figure S2. Excitation ( $\lambda_{em} = 480$  nm) and emission ( $\lambda_{exc} = 364$  nm) fluorescence spectra of **2**. (Na-cacodylate buffer,  $I = 0.05$  M, pH = 7.0).

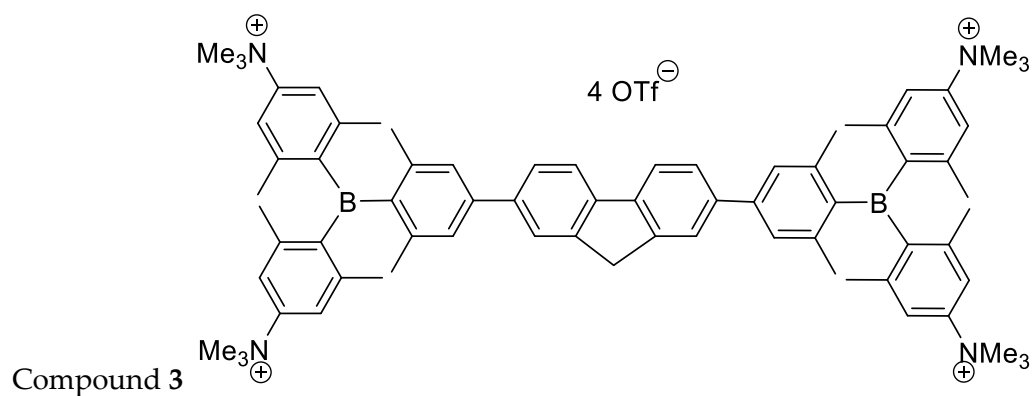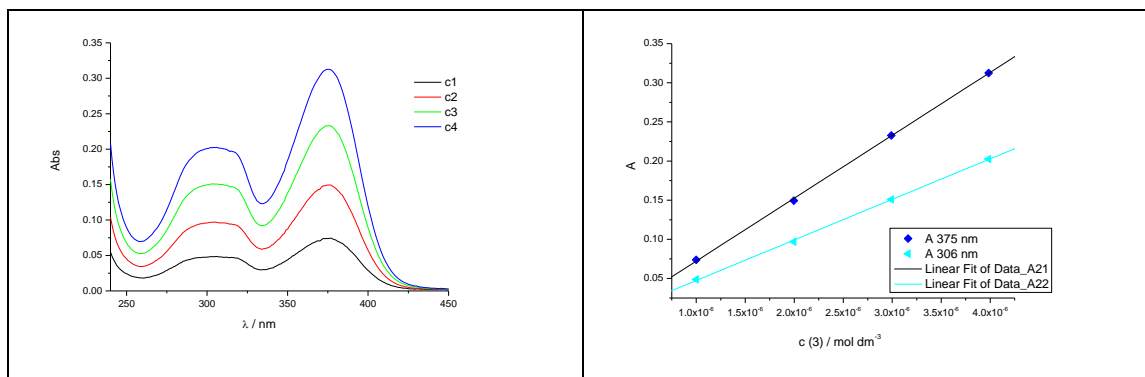

Figure S3. Left: UV/Vis spectra of **3** (concentration range from  $1 - 4 \times 10^{-6}$  M); Right: linear dependence of the absorbance at 306 and 375 nm on the **3** concentration (Na-cacodylate buffer,  $I = 0.05$  M, pH = 7.0).

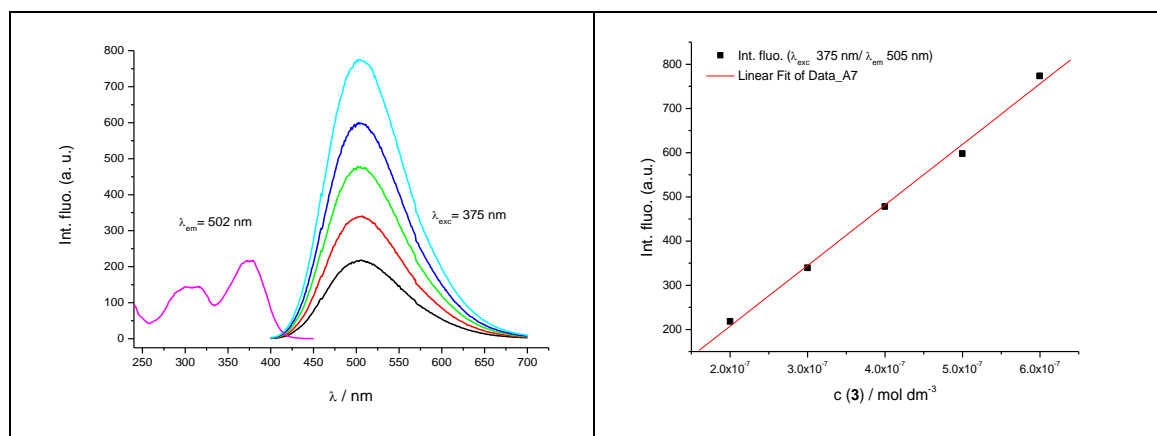

Figure S4. Left: Excitation ( $\lambda_{em} = 502$  nm,  $c = 2 \times 10^{-7}$  M) and emission ( $\lambda_{exc} = 375$  nm) fluorescence spectra of **3** ( $c_1$ - $c_5 = 2 - 6 \times 10^{-7}$  M); Right: linear dependence of the fluorescence intensity on the **3** concentration ( $\lambda_{exc} = 375$  nm,  $\lambda_{em} = 505$  nm, Na-cacodylate buffer,  $I=0.05$  M, pH = 7.0).

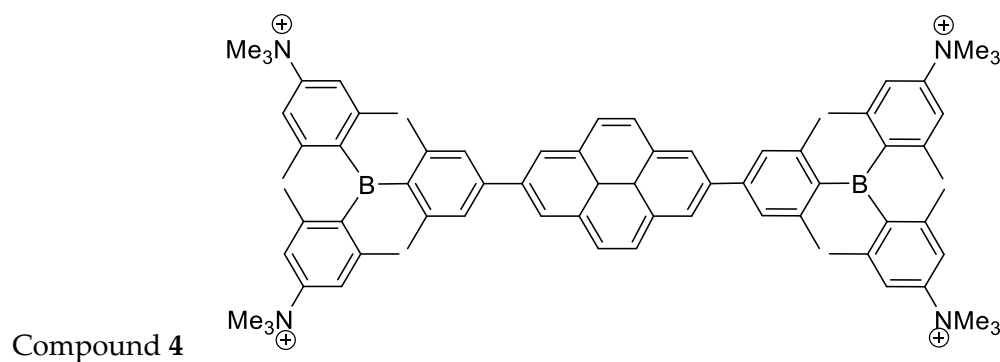

Compound **4**

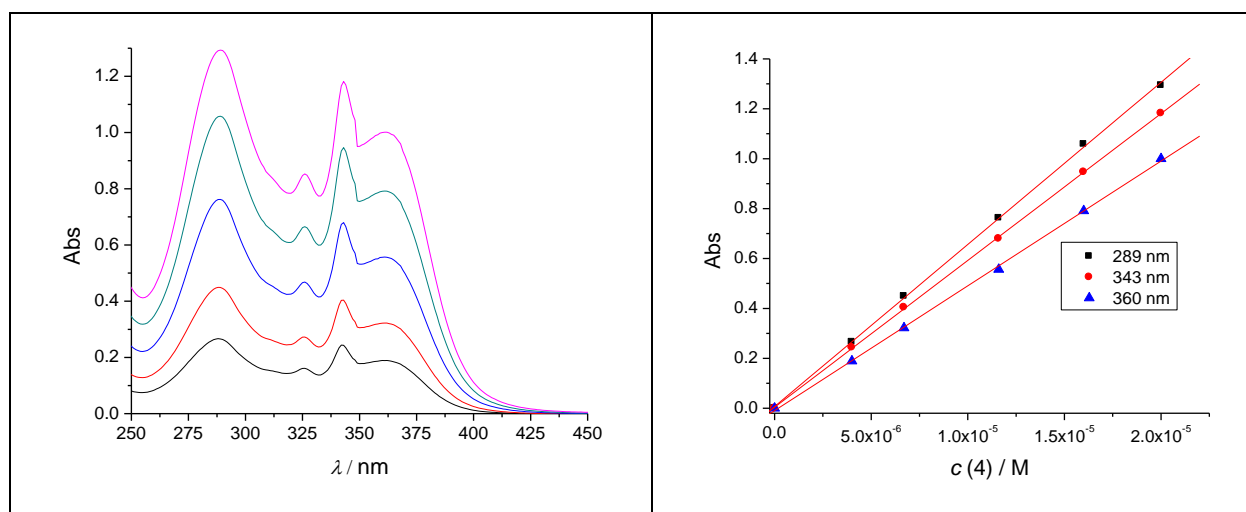

Figure S5. Left: UV/Vis spectra of **4** (concentration range from  $4 - 20 \times 10^{-6}$  M); Right: linear dependence (—) of the absorbance at different wavelengths on the **4** concentration (Na-cacodylate buffer,  $I = 0.05$  M, pH = 7.0).

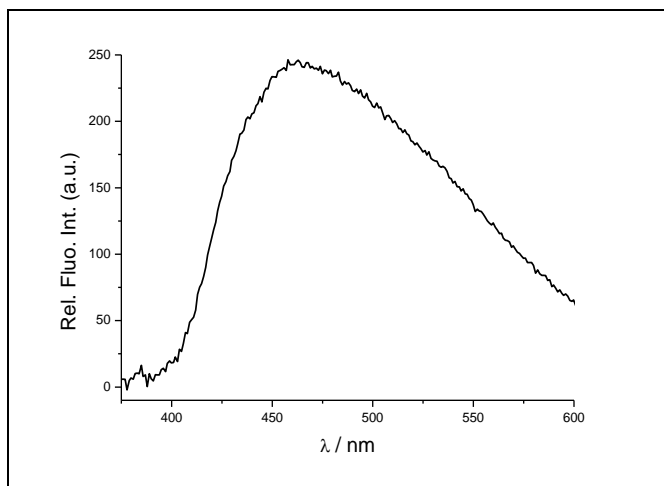

Figure S6. Emission fluorescence spectra of **4** ( $\lambda_{\text{exc}} = 345 \text{ nm}$ ,  $c = 5 \times 10^{-8} \text{ M}$  Na-cacodylate buffer,  $I = 0.05 \text{ M}$ ,  $\text{pH} = 7.0$ ).

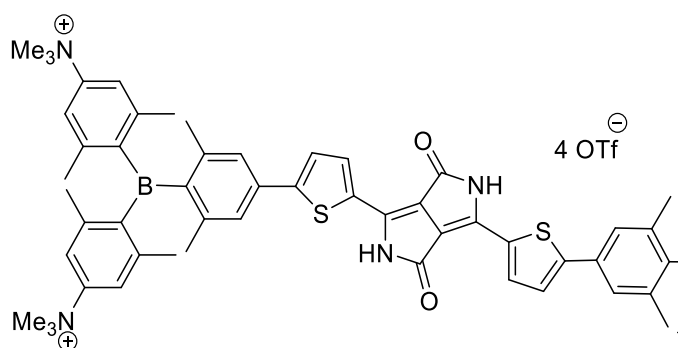

Compound **5**:

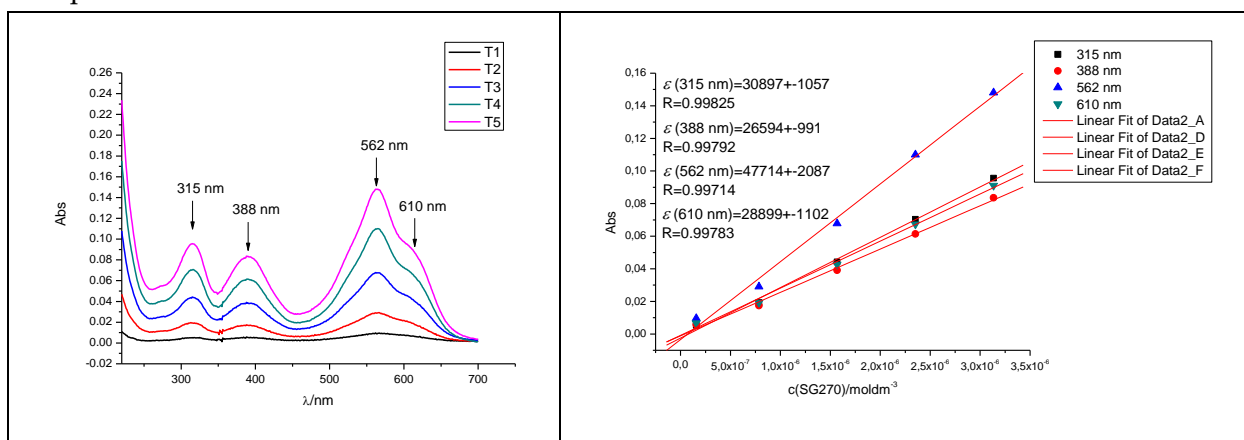

Figure S7. Left: UV/Vis spectra of **5** (concentration range from  $1.6 \times 10^{-7} - 3.1 \times 10^{-6} \text{ M}$ ); Right: linear dependence of the absorbance different wavelengths on the **5** concentration (Na-cacodylate buffer,  $I = 0.05 \text{ M}$ ,  $\text{pH} = 7.0$ ).

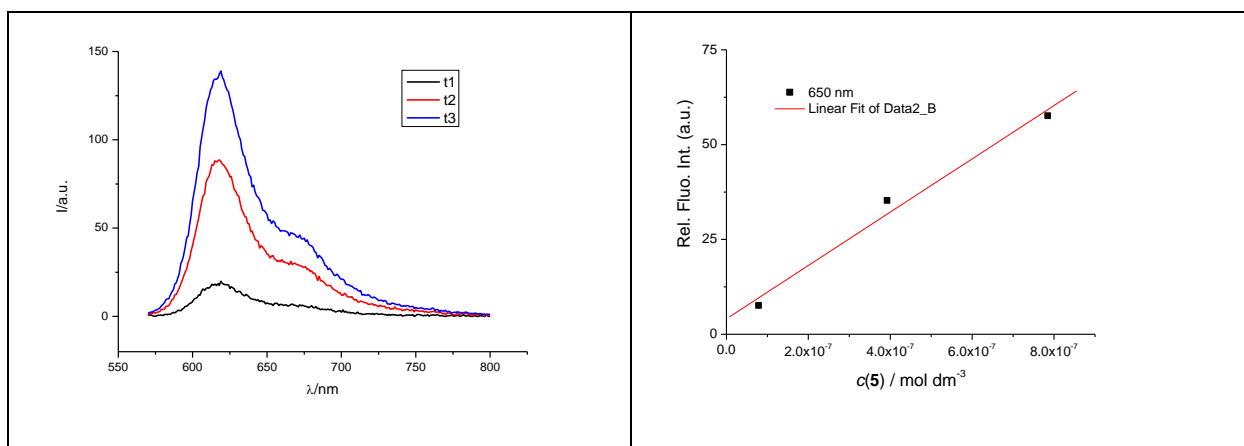

Figure S8. Left: Emission ( $\lambda_{\text{exc}} = 562 \text{ nm}$ ) fluorescence spectra of **5** ( $8 \times 10^{-8} - 2.4 \times 10^{-6} \text{ M}$ ); Right: Dependence of the fluorescence intensity on the **5** concentration at different emission wavelengths ( $\lambda_{\text{exc}} = 562 \text{ nm}$ ,  $\lambda_{\text{em}} = 505 \text{ nm}$ , Na-cacodylate buffer,  $I = 0.05 \text{ M}$ ,  $\text{pH} = 7.0$ ).

## Titrations with DNA/RNA:

UV/vis titrations:

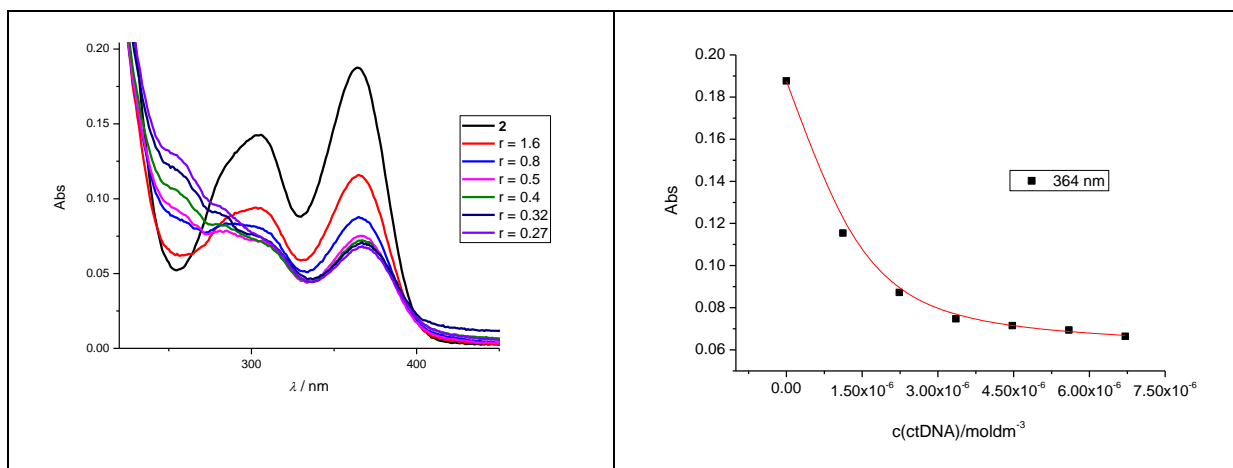

Figure S9. Left: UV-Vis titration of **2** ( $c = 1 \times 10^{-6}$  mol dm<sup>-3</sup>) with *ct*-DNA; Right: dependence of absorption at  $\lambda_{\max} = 364$  nm on  $c$  (*ct*-DNA); (Na-cacodylate buffer,  $I = 0.05$  M, pH = 7.0)

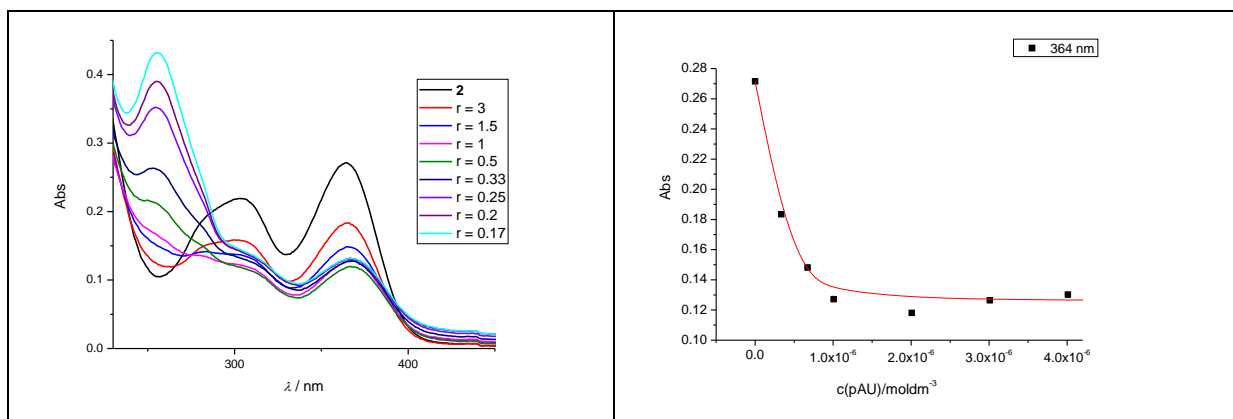

Figure S10. Left: UV-Vis titration of **2** ( $c = 1 \times 10^{-6}$  mol dm<sup>-3</sup>) with polyA – polyU; Right: dependence of absorption at  $\lambda_{\max} = 364$  nm on  $c$  (polyA – polyU); (Na-cacodylate buffer,  $I = 0.05$  M, pH = 7.0)

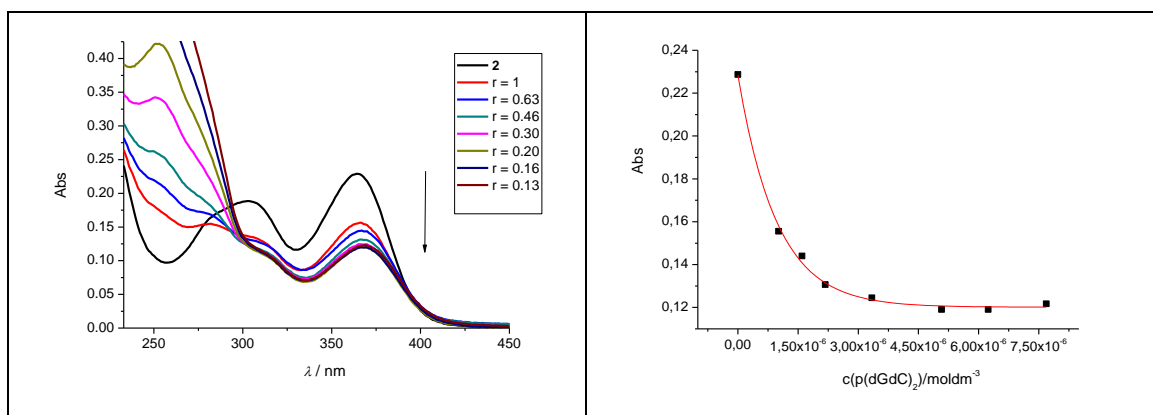

Figure S11. Left: UV-Vis titration of **2** ( $c = 1 \times 10^{-6} \text{ mol dm}^{-3}$ ) with poly(dGdC)<sub>2</sub>; Right: dependence of absorption at  $\lambda_{\max} = 364 \text{ nm}$  on  $c(\text{poly(dGdC)}_2)$ ; (Na-cacodylate buffer,  $I = 0.05 \text{ M}$ ,  $\text{pH} = 7.0$ )

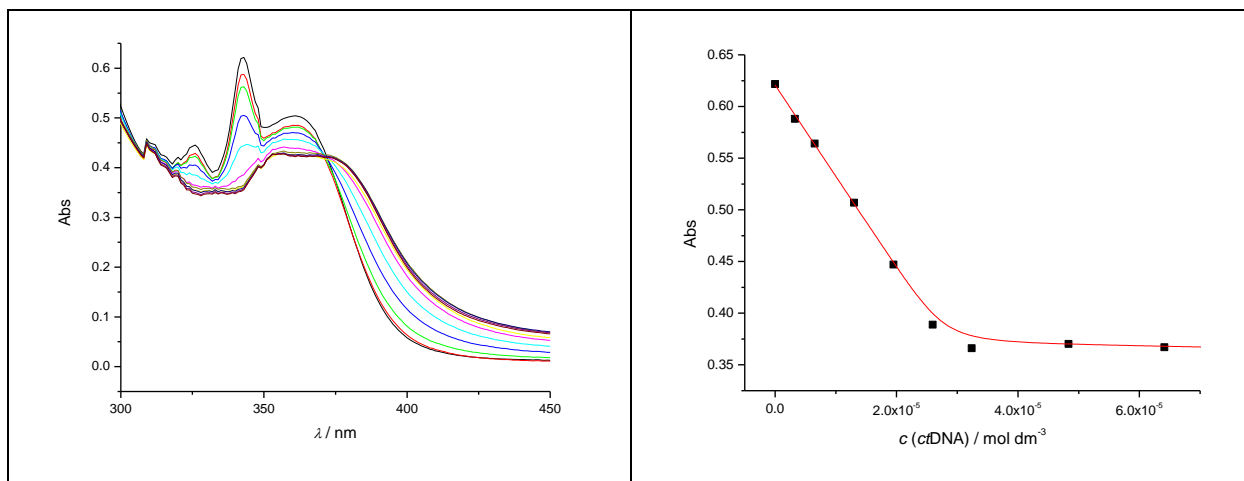

Figure S12. Left: UV-Vis titration of **4** ( $c = 1 \times 10^{-6} \text{ mol dm}^{-3}$ ) with ctDNA; Right: dependence of absorption at  $\lambda_{\max} = 343 \text{ nm}$  on  $c(\text{ctDNA})$ ; (Na-cacodylate buffer,  $I = 0.05 \text{ M}$ ,  $\text{pH} = 7.0$ )



# Fluorimetric titrations:

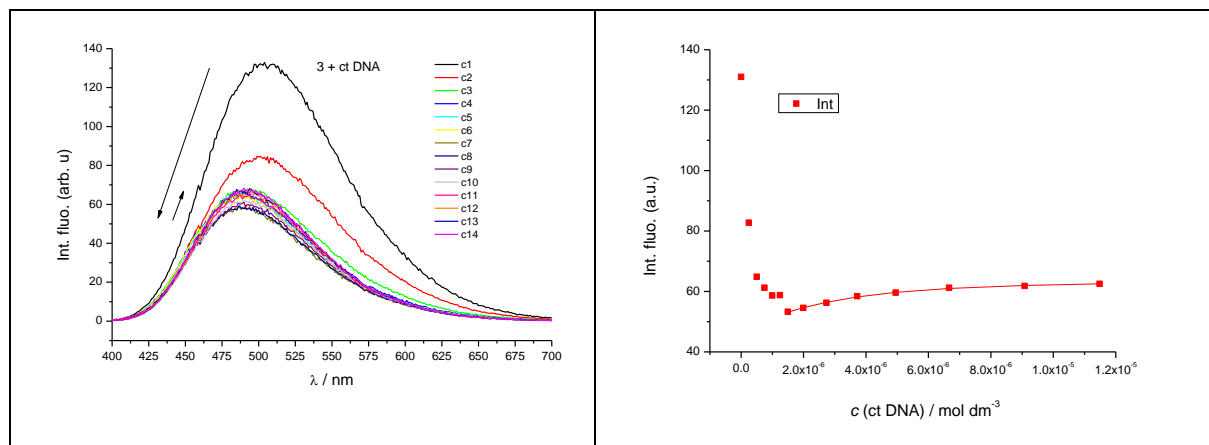

Figure S13. Left: Fluorimetric titration of **3**,  $\lambda_{\text{exc}} = 375 \text{ nm}$ ,  $c = 2 \times 10^{-7} \text{ mol dm}^{-3}$  with ct-DNA, Right: Experimental and calculated fluorescence intensities of **3** at  $\lambda_{\text{em}} = 505 \text{ nm}$  upon addition of ct-DNA (Na-cacodylate buffer,  $I = 0.05 \text{ M}$ ,  $\text{pH} = 7.0$ )

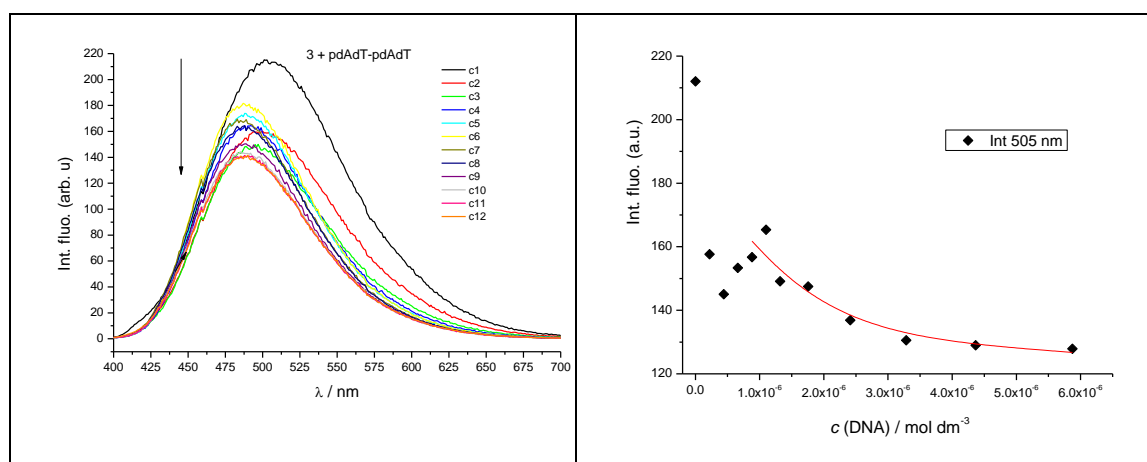

Figure S14. Left: Fluorimetric titration of **3**,  $\lambda_{\text{exc}} = 375 \text{ nm}$ ,  $c = 2 \times 10^{-7} \text{ mol dm}^{-3}$  with pdAdpT-pdAdpT, Right: Experimental and calculated fluorescence intensities of **3** at  $\lambda_{\text{em}} = 505 \text{ nm}$  upon addition of DNA (Na-cacodylate buffer,  $I = 0.05 \text{ M}$ ,  $\text{pH} = 7.0$ ).

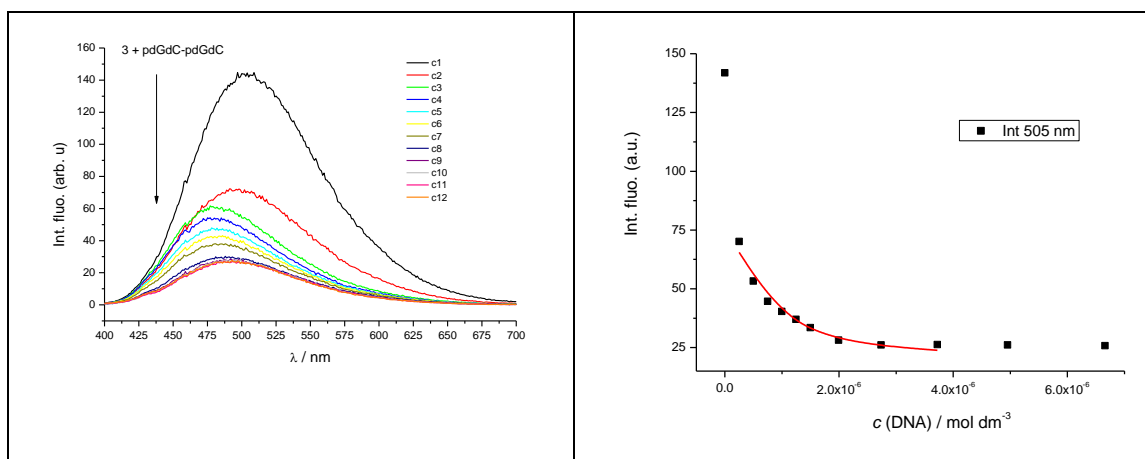

Figure S15. Left: Fluorimetric titration of **3**,  $\lambda_{\text{exc}} = 375$  nm,  $c = 2 \times 10^{-7}$  mol dm<sup>-3</sup> with pdGdC-pdGdC, Right: Experimental and calculated fluorescence intensities of **3** at  $\lambda_{\text{em}} = 505$  nm upon addition of DNA (Na-cacodylate buffer,  $I = 0.05$  M, pH = 7.0).

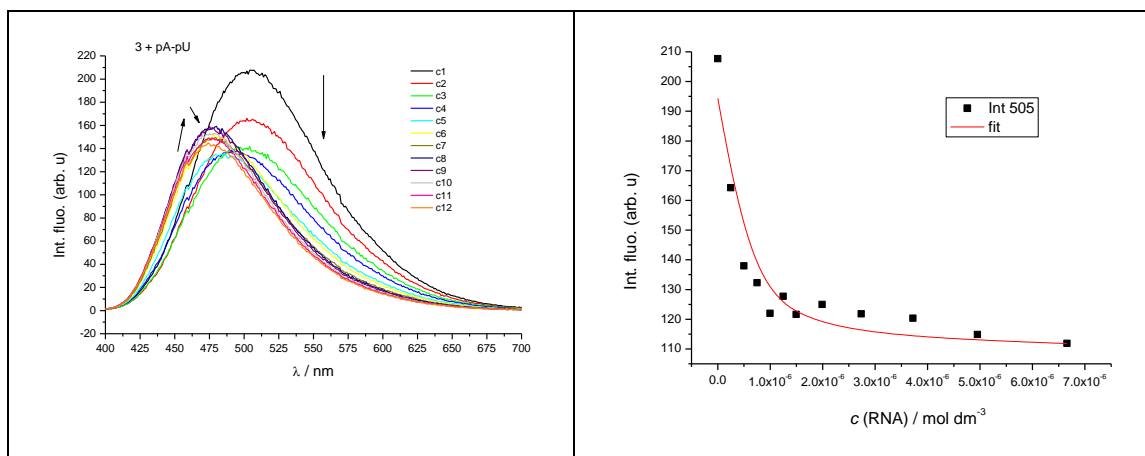

Figure S16. Left: Fluorimetric titration of **3**,  $\lambda_{\text{exc}} = 375$  nm,  $c = 2 \times 10^{-7}$  mol dm<sup>-3</sup> with pA-pU, Right: Experimental and calculated fluorescence intensities of **3** at  $\lambda_{\text{em}} = 505$  nm upon addition of RNA (Na-cacodylate buffer,  $I = 0.05$  M, pH = 7.0).

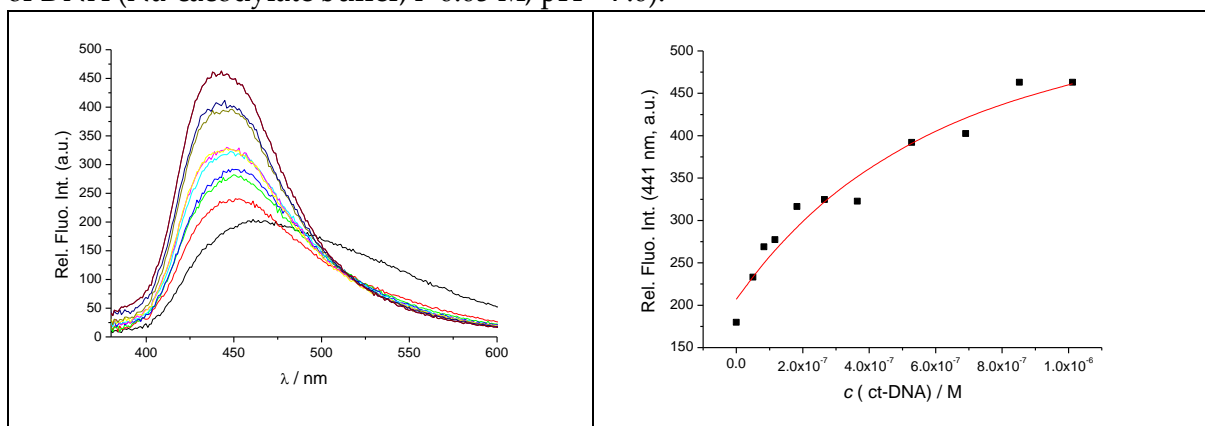

Figure S17. Left: Fluorimetric titration of **4**,  $\lambda_{\text{exc}} = 345$  nm,  $c = 5 \times 10^{-8}$  mol dm<sup>-3</sup> with ct-DNA, Right: Experimental and calculated fluorescence intensities of **4** at  $\lambda_{\text{em}} = 441$  nm upon addition of ct-DNA (Na-cacodylate buffer,  $I = 0.05$  M, pH = 7.0)

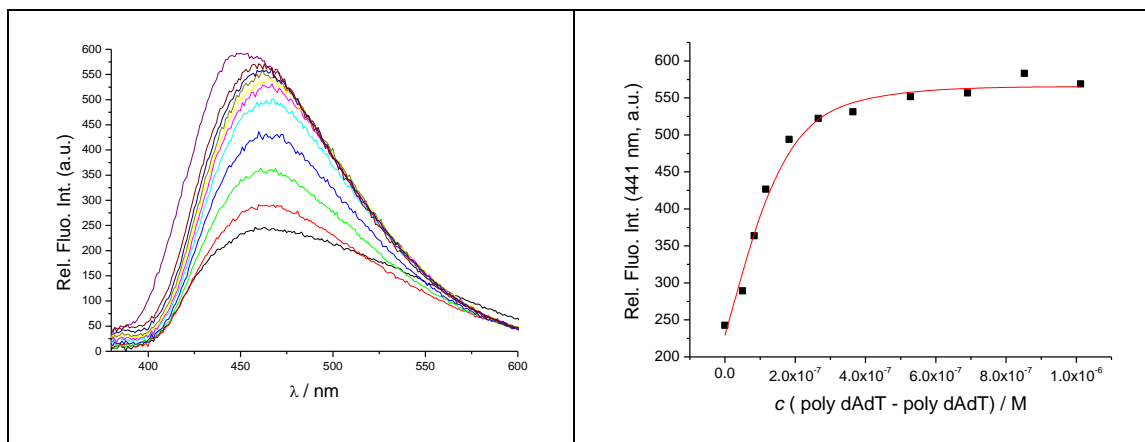

Figure S18. Left: Fluorimetric titration of **4**,  $\lambda_{\text{exc}} = 345$  nm,  $c = 5 \times 10^{-8} \text{ mol dm}^{-3}$  with pdAdpT-  
pdAdpT, Right: Experimental and calculated fluorescence intensities of **4** at  $\lambda_{\text{em}} = 441$  nm upon  
addition of DNA (Na-cacodylate buffer,  $I = 0.05$  M, pH = 7.0).

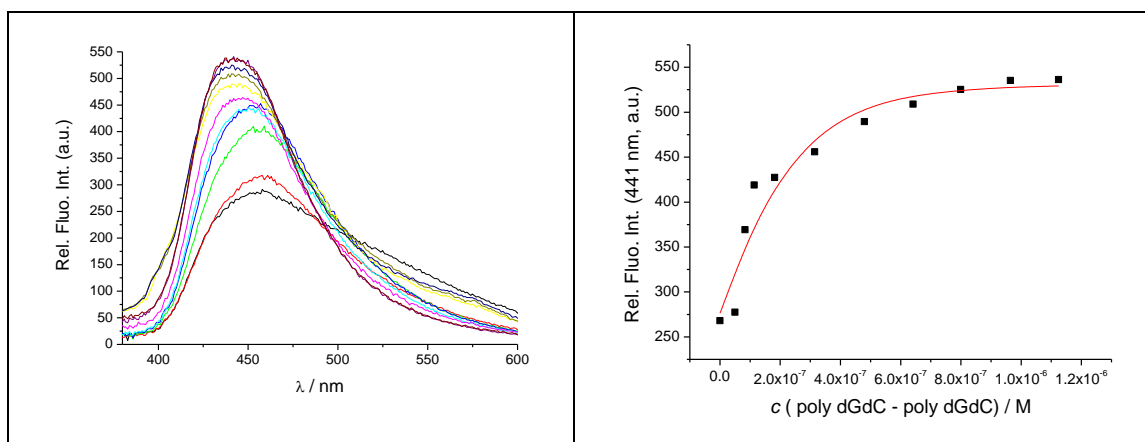

Figure S19. Left: Fluorimetric titration of **4**,  $\lambda_{\text{exc}} = 345$  nm,  $c = 5 \times 10^{-8} \text{ mol dm}^{-3}$  with pdGpdC-  
pdGpdC, Right: Experimental and calculated fluorescence intensities of **4** at  $\lambda_{\text{em}} = 441$  nm upon  
addition of DNA (Na-cacodylate buffer,  $I = 0.05$  M, pH = 7.0).

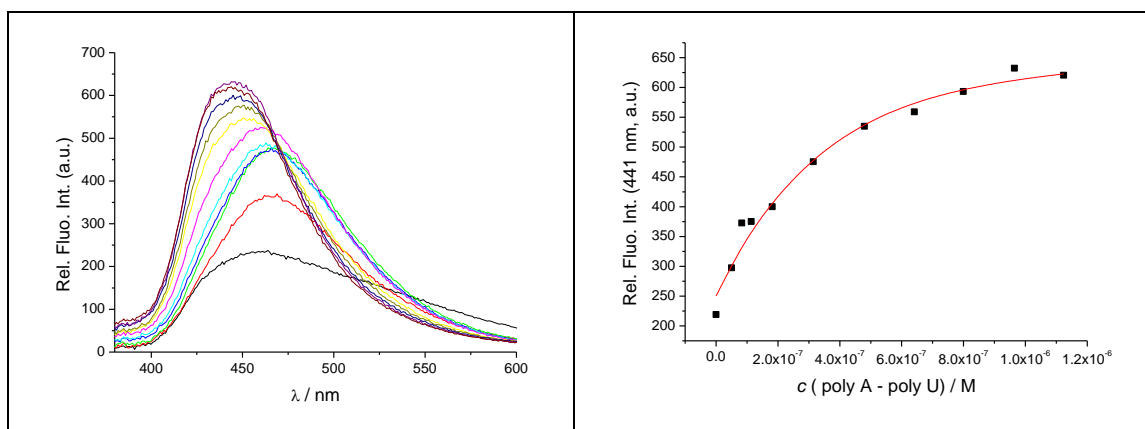

Figure S20. Left: Fluorimetric titration of **4**,  $\lambda_{\text{exc}} = 345 \text{ nm}$ ,  $c = 5 \times 10^{-8} \text{ mol dm}^{-3}$  with pA-pU, Right: Experimental and calculated fluorescence intensities of **4** at  $\lambda_{\text{em}} = 441 \text{ nm}$  upon addition of DNA (Na-cacodylate buffer,  $I = 0.05 \text{ M}$ ,  $\text{pH} = 7.0$ ).

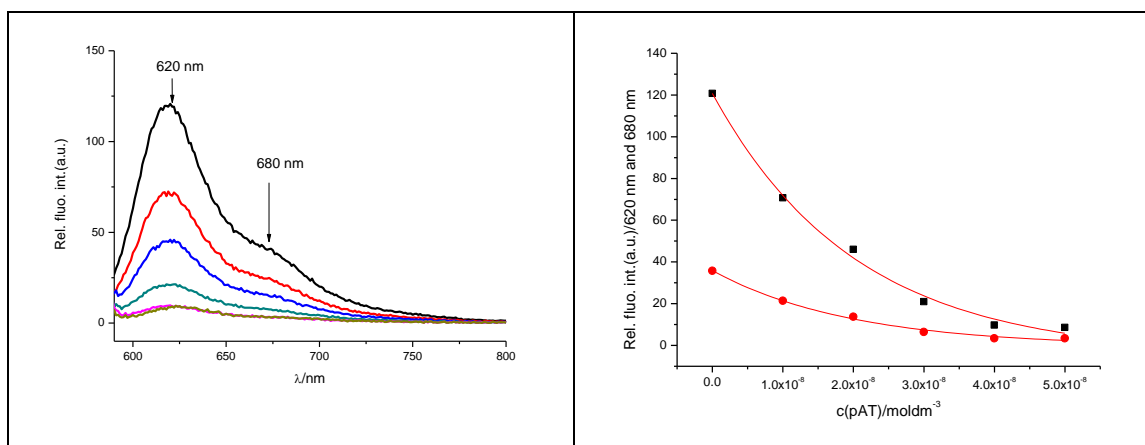

Figure S21. Left: Fluorimetric titration of **5**,  $\lambda_{\text{exc}} = 562 \text{ nm}$ ,  $c = 5 \times 10^{-8} \text{ mol dm}^{-3}$  with pdApdT-pdApdT, Right: Experimental and calculated fluorescence intensities of **5** at  $\lambda_{\text{em}} = 620 \text{ nm}$  and  $680 \text{ nm}$  upon addition of DNA (Na-cacodylate buffer,  $I = 0.05 \text{ M}$ ,  $\text{pH} = 7.0$ ).

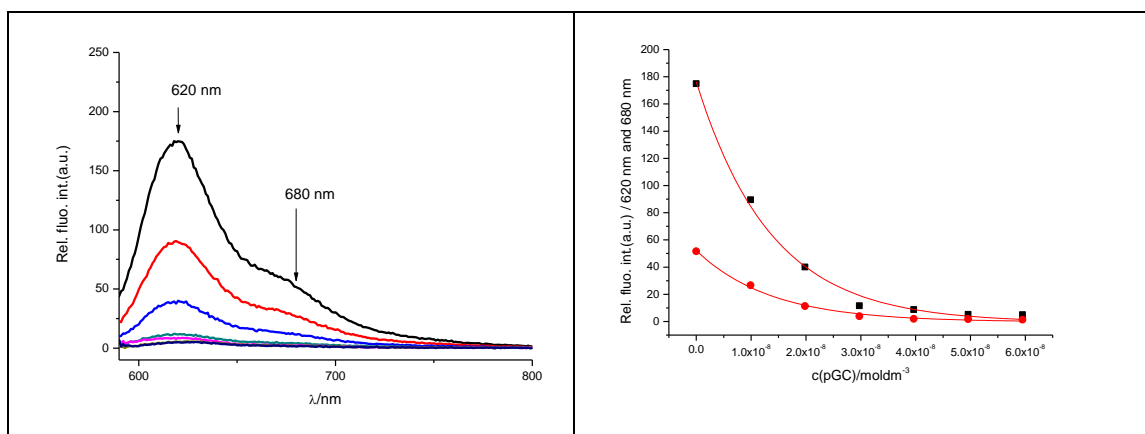

Figure S22. Left: Fluorimetric titration of **5**,  $\lambda_{exc} = 562$  nm,  $c = 5 \times 10^{-8}$  mol  $\text{dm}^{-3}$  with pdGpdC-pdGpdC, Right: Experimental and calculated fluorescence intensities of **5** at  $\lambda_{em} = 620$  nm and 680 nm upon addition of DNA (Na-cacodylate buffer,  $I = 0.05$  M, pH = 7.0).

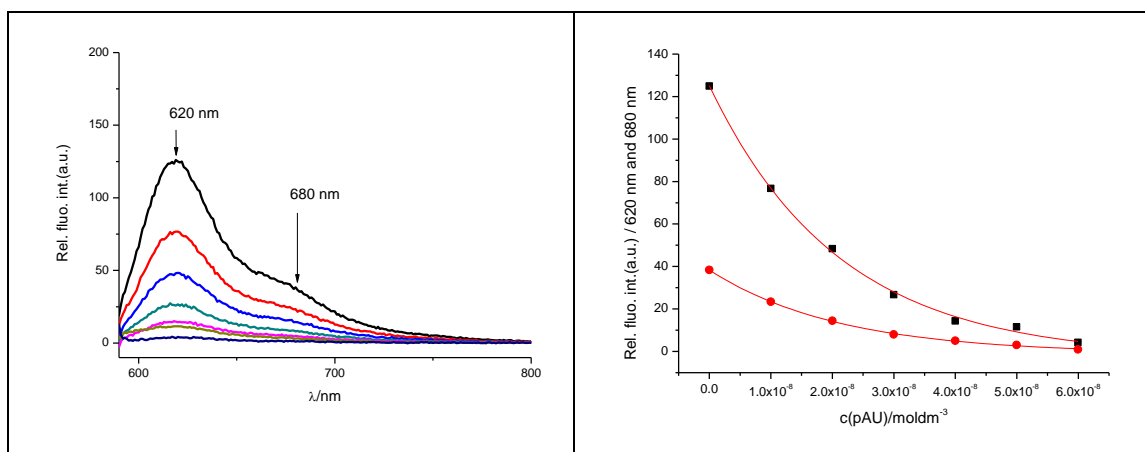

Figure S23. Left: Fluorimetric titration of **5**,  $\lambda_{exc} = 562$  nm,  $c = 5 \times 10^{-8}$  mol  $\text{dm}^{-3}$  with pA-pU, Right: Experimental and calculated fluorescence intensities of **5** at  $\lambda_{em} = 620$  nm and 680 nm upon addition of DNA (Na-cacodylate buffer,  $I = 0.05$  M, pH = 7.0).

## Thermal melting experiments

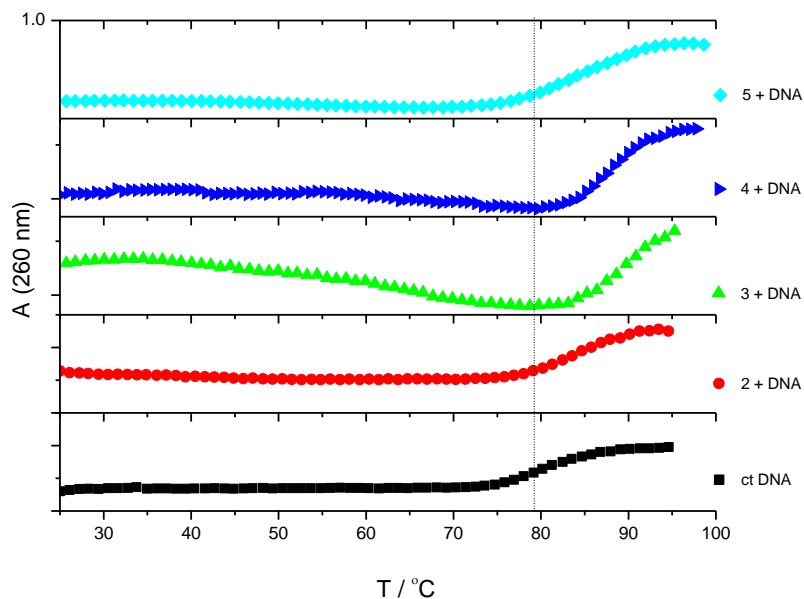

Figure S24. Melting curves of *ct* DNA upon addition of compounds **2-5** ( $c(\text{DNA}) = 2 \times 10^{-5} \text{ M}$ ; ratio  $r[\text{compound}] / [\text{polynucleotide}] = 0.1$ ) (Na-cacodylate buffer,  $I = 0.05 \text{ mol dm}^{-3}$ ,  $\text{pH} = 7.0$ ).

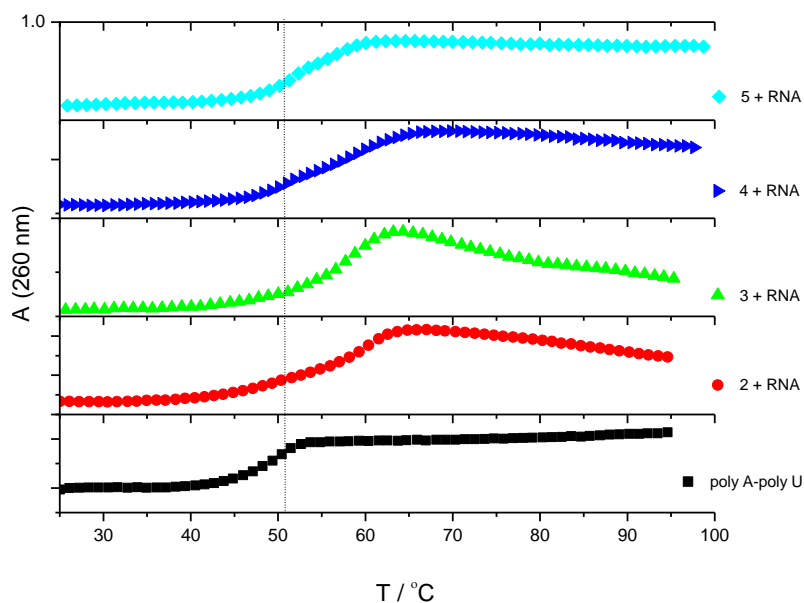

Figure S25. Melting curves of poly rA-poly rU upon addition of compounds **2-5** ( $c(\text{RNA}) = 2 \times 10^{-5} \text{ M}$ ; ratio  $r[\text{compound}] / [\text{polynucleotide}] = 0.1$ ) (Na-cacodylate buffer,  $I = 0.05 \text{ mol dm}^{-3}$ ,  $\text{pH} = 7.0$ ).

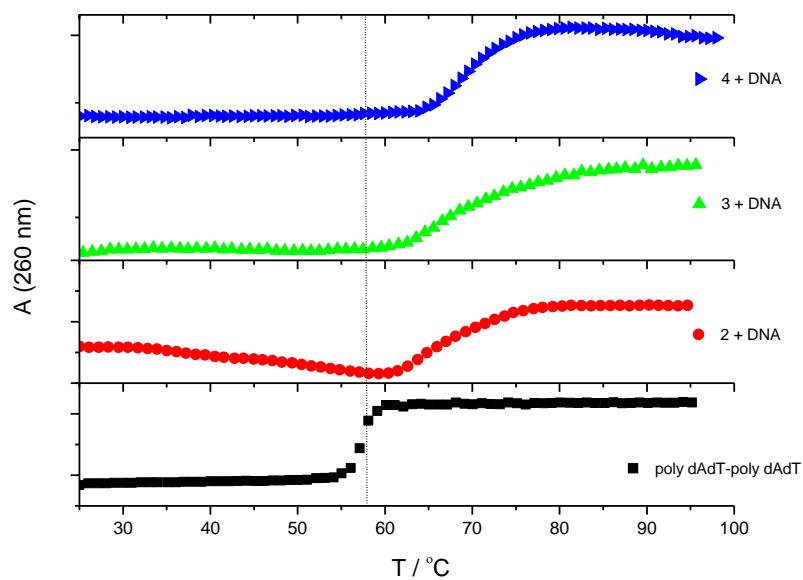

Figure S26. Melting curves of poly dAdT-poly dAdT upon addition of compounds **2-4** ( $c(\text{DNA}) = 2 \times 10^{-5} \text{ M}$ ; ratio  $r[\text{compound}] / [\text{polynucleotide}] = 0.1$ ) (Na-cacodylate buffer,  $I = 0.05 \text{ mol dm}^{-3}$ ,  $\text{pH} = 7.0$ ).

## CD experiments

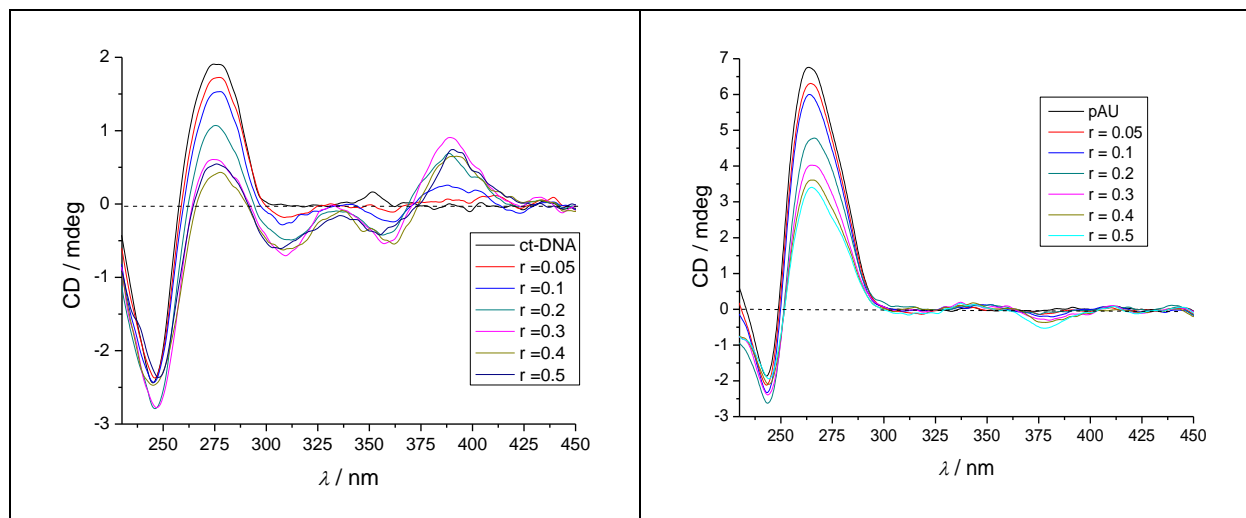

Figure S27. CD titration of ct-DNA (Left) and poly A- poly U (Right) with **2** ( $c = 2 \times 10^{-5}$  M) at molar ratios  $r = [\text{compound}] / [\text{polynucleotide}]$  (pH 7.0, buffer sodium cacodylate,  $I = 0.05$  M)

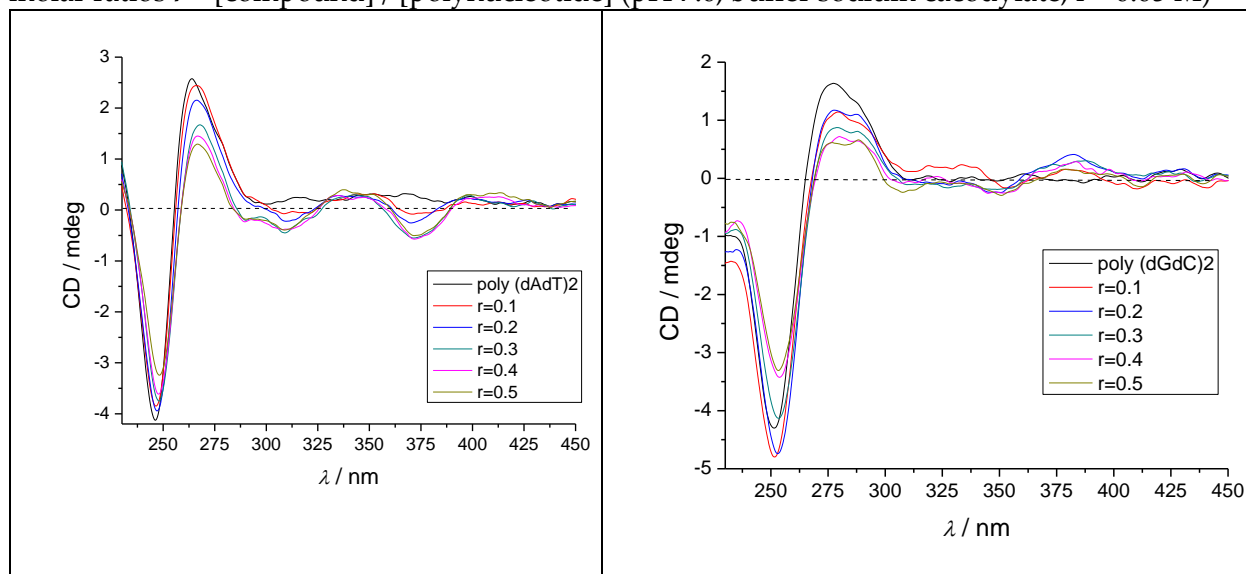

Figure S28. CD titration of poly dAdT – poly dAdT (Left) and poly dGdC - poly dGdC (Right) with **2** ( $c = 2 \times 10^{-5}$  M) at molar ratios  $r = [\text{compound}] / [\text{polynucleotide}]$  (pH 7.0, buffer sodium cacodylate,  $I = 0.05$  M)



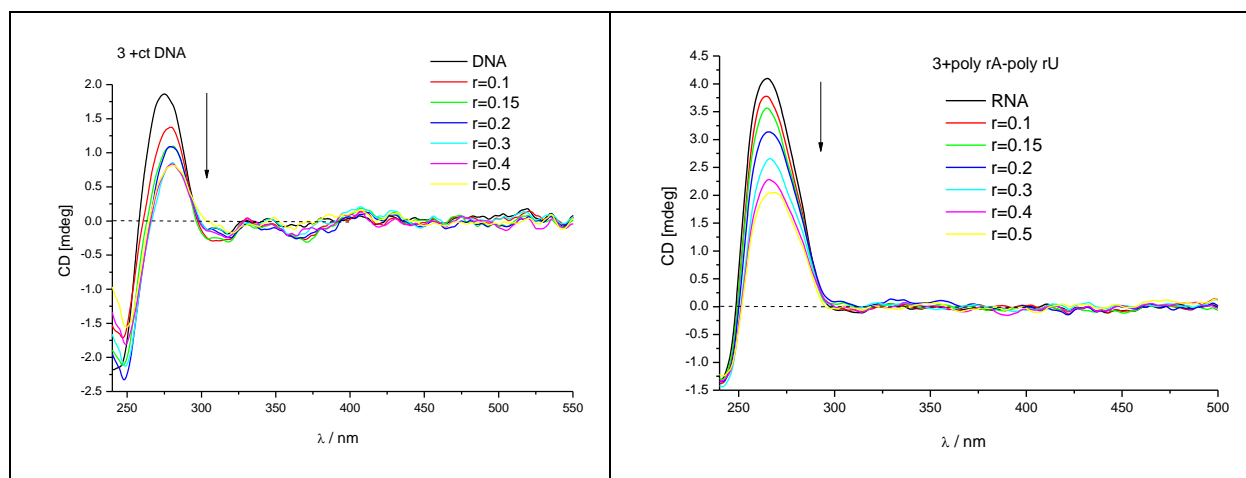

Figure S29. CD titration of ct-DNA ( $c = 2 \times 10^{-5}$  M) (Left) and poly A- poly U ( $c = 1.0 \times 10^{-5}$  M) (Right) with 3 at molar ratios  $r = [\text{compound}] / [\text{polynucleotide}]$  (pH 7.0, buffer sodium cacodylate,  $I = 0.05$  M)

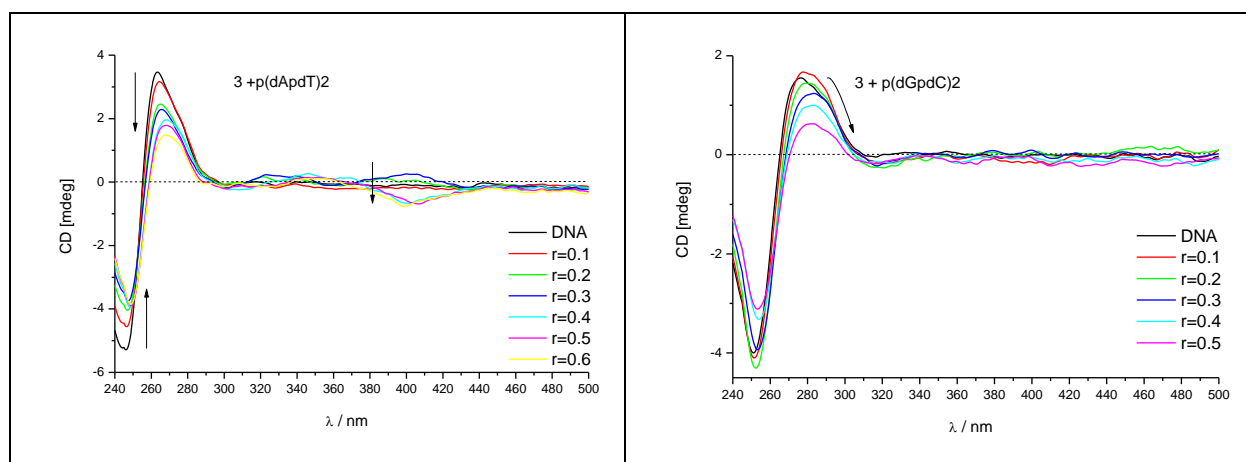

Figure S30. CD titration of poly dAdT – poly dAdT (Left) and poly dGdC - poly dGdC (Right) with 3 ( $c = 2 \times 10^{-5}$  M) at molar ratios  $r = [\text{compound}] / [\text{polynucleotide}]$  (pH 7.0, buffer sodium cacodylate,  $I = 0.05$  M)

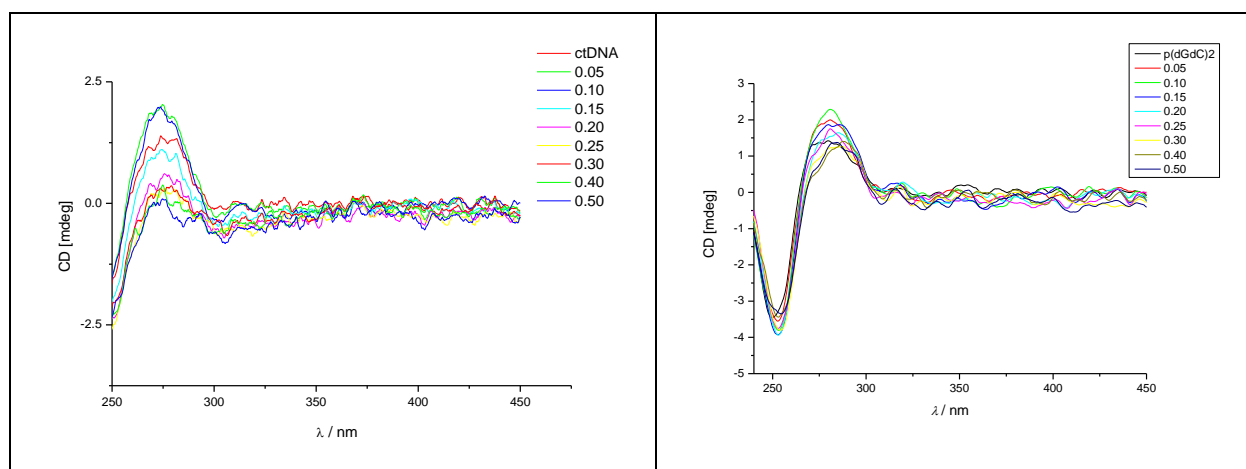

Figure S31. CD titration of ctDNA (Left) and poly dGdC - poly dGdC (Right) with **4** ( $c = 2 \times 10^{-5}$  M) at molar ratios  $r = [\text{compound}] / [\text{polynucleotide}]$  (pH 7.0, buffer sodium cacodylate,  $I = 0.05$  M)

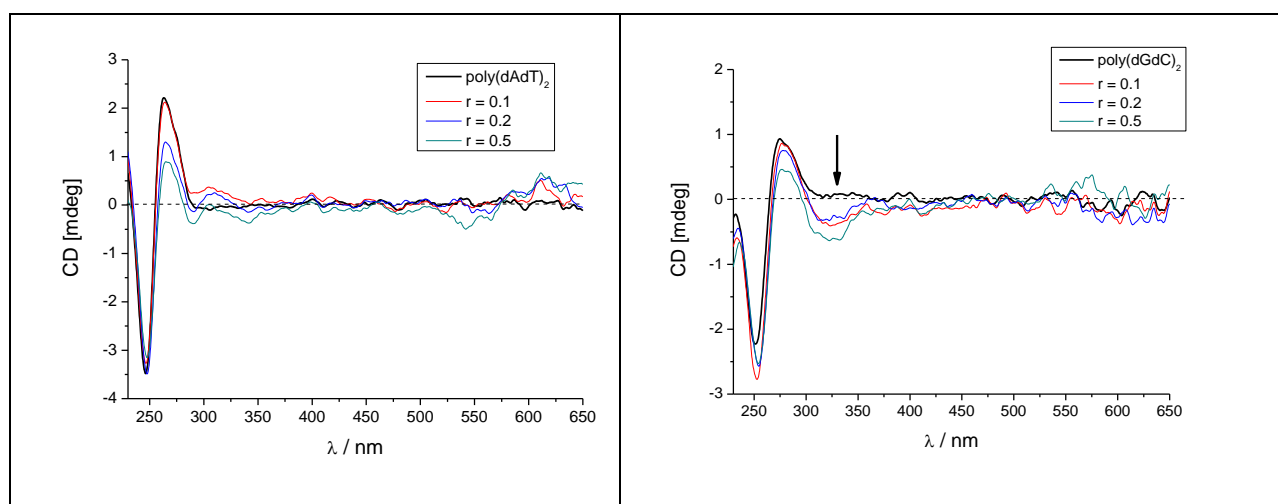

Figure S32. CD titration of poly(dAdT)<sub>2</sub> ( $c = 2.0 \times 10^{-5}$  M) (Left) and poly(dGdC)<sub>2</sub> (Right) ( $c = 2.0 \times 10^{-5}$  M), with **5** at molar ratios  $r = [\text{5}] / [\text{polynucleotide}]$  (pH 7, buffer sodium cacodylate,  $I = 0.05$  M).

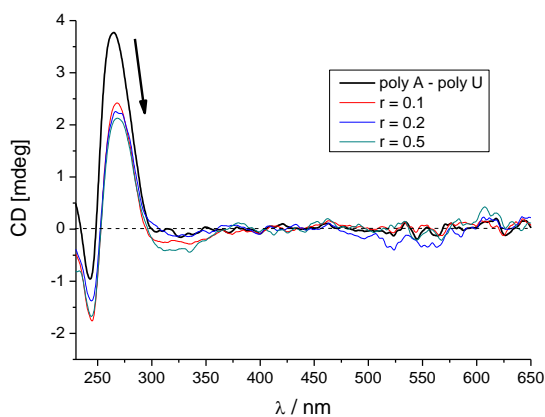

Figure S33. CD titration of poly A – poly U ( $c = 2.0 \times 10^{-5}$  M), with **5** at molar ratios  $r = [\mathbf{5}] / [\text{polynucleotide}]$  (pH 7, buffer sodium cacodylate,  $I = 0.05$  M).

#### References

1. Saenger, W. *Principles of Nucleic Acid Structure*; Springer: New York, NY, USA, 1983; p. 226.
2. Cantor, C.R.; Schimmel, P.R. *Biophysical Chemistry Part III: The Behavior of Biological Macromolecules*; W.H. Freeman and Company: San Francisco, CA, USA, 1980; pp. 1109–1181.
3. Griesbeck, S.; Michail, E.; Wang, C.; Ogasawara, H.; Lorenzen, S.; Gerstner, L.; Zang, T.; Nitsch, J.; Sato, Y.; Bertermann, R.; et al. Tuning the  $\pi$ -bridge of quadrupolar triarylborane chromophores for one- and two-photon excited fluorescence imaging of lysosomes in live cells. *Chem. Sci.* **2019**, *10*, 5405–5422.
